# Supplementary material
Source: Copernicus journal article supplement (doi:10.5194/acp-26-4727-2026)
Supplement: Supplementary file 1 [file acp-26-4727-2026-supplement.pdf]

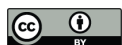

*Supplement of*

**Microphysical properties of various precipitation systems worldwide classified via objective methods based on dual-frequency precipitation radar observations**

**Yujia Zhang et al.**

*Correspondence to:* Xiang Ni (nixiang@swu.edu.cn)

The copyright of individual parts of the supplement might differ from the article licence.

# Media

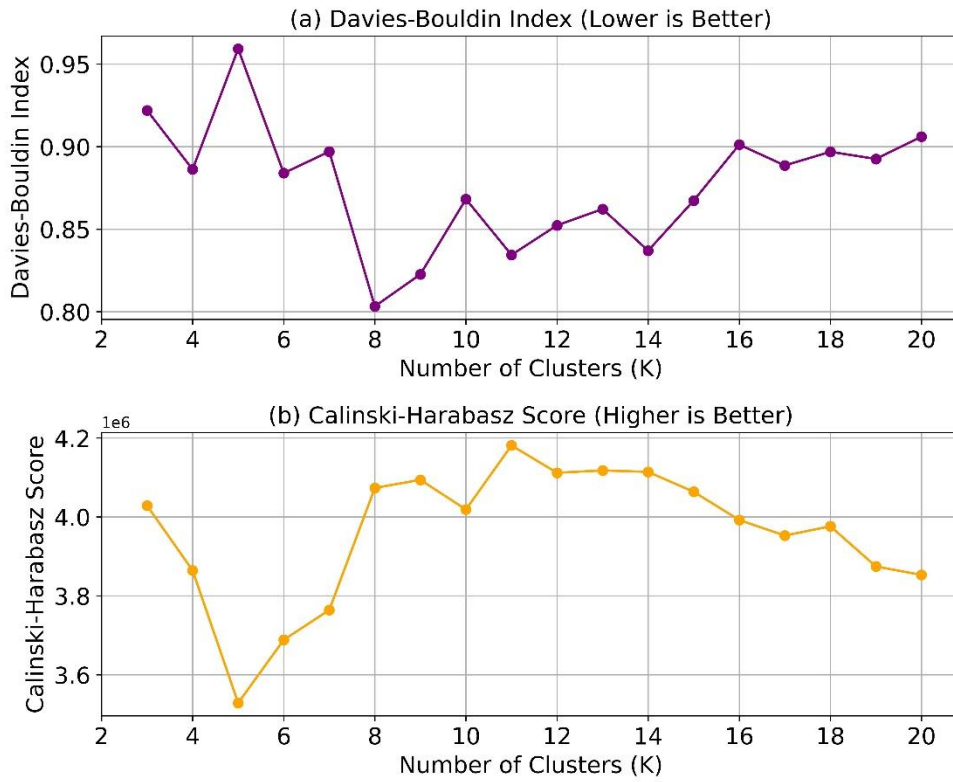

**Fig. S1.** Changes in DB index and CH score with the number of clusters from 2 to 20.

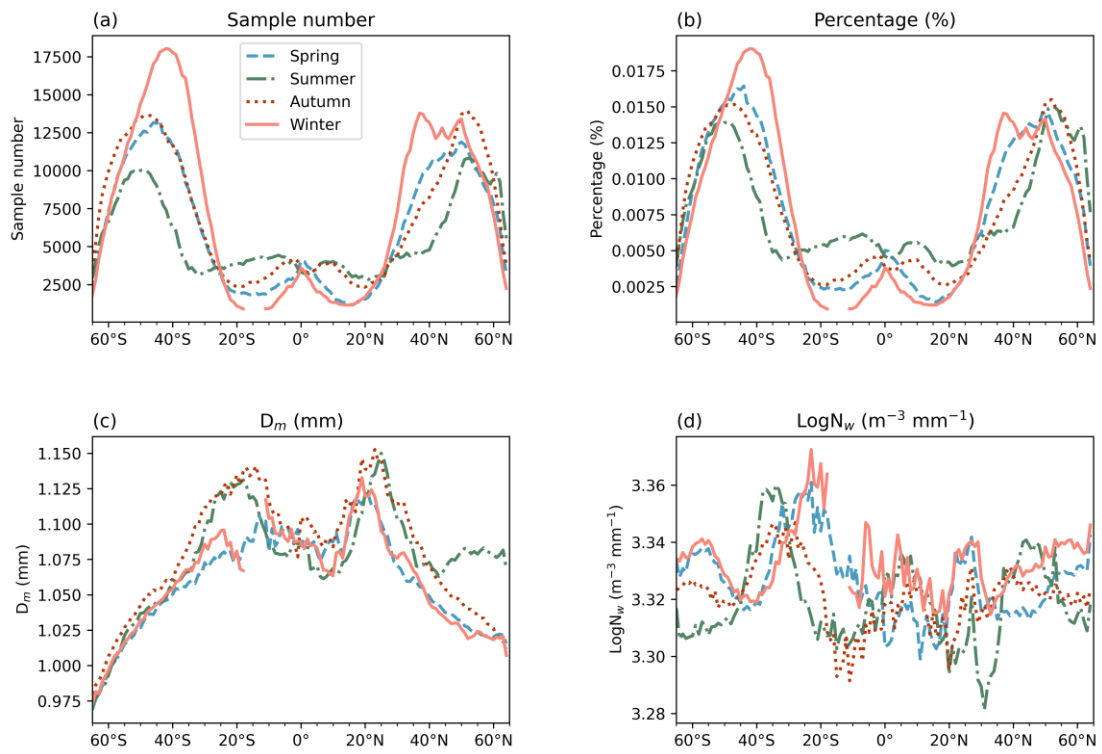

**Fig. S2.** Changes in (a) the number of samples, (b) percentage of precipitation systems reaching 2.5 km in echo top height, (c) the mass-weighted mean diameter ( $D_m$ ), and (d) the normalized intercept parameter ( $N_w$ ) with latitude for High-latitude shallow PS. (Latitudes will be excluded if their sample size does not reach 0.002 of the total sample sizes.)

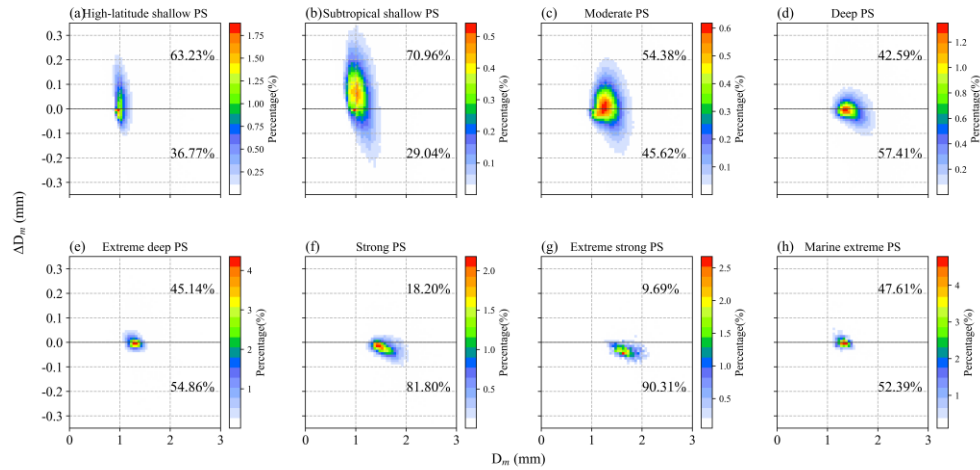

**Fig. S3.** Two-dimensional probability density functions of  $D_m$  at 3 km and  $\Delta D_m$  between 2 km and 3 km for the different PSs.
